# Supplementary material for: Risk of Immune-Related Pancreatitis in Patients with Solid Tumors Treated with Immune Checkpoint Inhibitors: Systematic Assessment with Meta-Analysis
Source: Hindawi journal article supplement (doi:10.1155/2018/1027323), 2018-06-03

**Supplementary Table1: Search performed in Pubmed and Embase**

| <b>PubMed</b> |                                                                                                                                                                                                                                                                                                                                                                                                                                                                                                                                                                                                                                                                                                                                                                                                                                                                                                                            |                                    |
|---------------|----------------------------------------------------------------------------------------------------------------------------------------------------------------------------------------------------------------------------------------------------------------------------------------------------------------------------------------------------------------------------------------------------------------------------------------------------------------------------------------------------------------------------------------------------------------------------------------------------------------------------------------------------------------------------------------------------------------------------------------------------------------------------------------------------------------------------------------------------------------------------------------------------------------------------|------------------------------------|
| <b>#1</b>     | ((((((((Neoplasms) OR Neoplasia) OR Neoplasias) OR Neoplasm) OR Tumors) OR Tumor) OR Malignancy) OR Malignancies) OR Cancer) OR Cancers                                                                                                                                                                                                                                                                                                                                                                                                                                                                                                                                                                                                                                                                                                                                                                                    | <b>4029451</b>                     |
| <b>#2</b>     | ((((((((nivolumab) OR MDX-1106) OR ONO-4538) OR BMS-936558) OR Opdivo))<br>OR<br>(((pembrolizumab) OR lambrolizumab) OR Keytruda) OR MK-3475))<br>OR<br>((Durvalumab)<br>OR<br>((((atezolizumab) OR anti-PDL1) OR immunoglobulin g1,anti (human cd antigens cd274) (human monoclonal mdpl3280a heavy chain) , disulfide with human monoclonal mdpl3280a kappa-chain, dimer) OR MPDL3280A) OR tecentriq) OR RG7446) OR RG-7446))<br>OR<br>((avelumab) OR MSB0010718C))<br>OR<br>((((((((tremelimumab) OR ticilimumab) OR CP 675) OR CP675 cpd) OR CP-675) OR CP-675,206) OR CP-675206) OR CP675206) OR CP 675206))<br>OR<br>((((((((Ipilimumab) OR Anti CTLA 4 MAb Ipilimumab) OR Anti-CTLA-4 MAb Ipilimumab) OR Ipilimumab, Anti-CTLA-4 MAb) OR Yervoy) OR MDX010) OR MDX 010) OR MDX-010 M) OR DX-CTLA-4) OR MDX CTLA 4                                                                                                   | <b>8497</b>                        |
| <b>#3</b>     | ((((((((randomized controlled trail) OR controlled clinicaltrail) OR randomized) OR randomly) OR trial))                                                                                                                                                                                                                                                                                                                                                                                                                                                                                                                                                                                                                                                                                                                                                                                                                   | <b>949142</b>                      |
| <b>#4</b>     | <b>#1 AND #2 AND #3</b>                                                                                                                                                                                                                                                                                                                                                                                                                                                                                                                                                                                                                                                                                                                                                                                                                                                                                                    | <b>Final search</b><br><b>1262</b> |
| <b>EMBASE</b> |                                                                                                                                                                                                                                                                                                                                                                                                                                                                                                                                                                                                                                                                                                                                                                                                                                                                                                                            |                                    |
| <b>#1</b>     | acral AND ('tumor'/exp OR tumor) OR 'neoplasms'/exp OR neoplasms OR (acral AND ('tumour'/exp OR tumour)) OR (('neoplasms'/exp OR neoplasms) AND by AND histologic AND type) OR (neoplasms, AND cystic, AND mucinous, AND serous) OR (neoplasms, AND embryonal AND mixed) OR (neoplasms, AND ('germ'/exp OR germ) AND ('cell'/exp OR cell) AND embryonal;) OR (neoplasms, AND glandular AND epithelial;) OR (neoplasms, AND 'hormone dependent;') OR (neoplasms, AND 'post traumatic') OR (neoplastic AND ('disease'/exp OR disease)) OR 'tumor'/exp OR tumor OR 'tumour'/exp OR tumour                                                                                                                                                                                                                                                                                                                                     | <b>4766232</b>                     |
| <b>#2</b>     | 'ipilimumab'/exp OR ipilimumab OR (bms AND 734016;) OR bms734016; OR (mdx AND 010) OR (mdx AND 101;) OR 'mdx010'/exp OR mdx 010 OR 'mdx101'/exp OR mdx101 OR strentarga; OR 'yervoy'/exp OR yervoy<br>OR<br>'ticilimumab'/exp OR ticilimumab OR (cp AND 675, AND 206) OR (cp AND 675206) OR (cp AND 675 AND 206) OR (cp675, AND 206) OR 'cp675206'/exp OR cp675206 OR 'tremelimumab'/exp OR tremelimumab<br>OR<br>'nivolumab'/exp OR nivolumab OR (bms AND 936558) OR 'bms936558'/exp OR bms936558 OR (mdx AND 1106) OR (ono AND 4538) OR 'mdx1106'/exp OR mdx1106 OR 'ono4538'/exp OR ono4538 OR 'opdivo'/exp OR opdivo<br>OR<br>'pembrolizumab'/exp OR pembrolizumab OR 'keytruda'/exp OR keytruda OR 'lambrolizumab'/exp OR lambrolizumab OR (mk AND 3475) OR 'mk3475'/exp OR mk3475<br>OR<br>'avelumab'/exp OR avelumab OR bavenci OR (msb AND 0010718) OR (msb AND 10682) OR (msb AND 0010682) OR msb0010718c; OR msb | <b>14116</b>                       |

|           |                                                                                                                                                                                                                                                                                                                                                                                                                                                                                                                                |                                    |
|-----------|--------------------------------------------------------------------------------------------------------------------------------------------------------------------------------------------------------------------------------------------------------------------------------------------------------------------------------------------------------------------------------------------------------------------------------------------------------------------------------------------------------------------------------|------------------------------------|
|           | <p>10682; OR 'msb10718c'/exp OR msb10718c</p> <p>OR</p> <p>'atezolizumab'/exp OR atezolizumab OR (monoclonal AND ('antibody'/exp OR antibody) AND mpdl AND 3280a) OR (monoclonal AND ('antibody'/exp OR antibody) AND ('mpdl3280a'/exp OR mpdl3280a)) OR (mpdl AND 3280a) OR 'mpdl3280a'/exp OR mpdl3280a OR (rg AND 7446)</p> <p>OR 'rg7446'/exp OR rg7446 OR 'tecentriq'/exp OR tecentriq OR 'tecntriq'/exp OR tecntriq</p> <p>OR</p> <p>'durvalumab'/exp OR durvalumab OR (medi AND 4736) OR 'medi4736'/exp OR medi4736</p> |                                    |
| <b>#3</b> | <p>randomized AND controlled AND ('trial'/exp OR trial) OR (controlled AND trial, AND randomized;) OR 'randomized controlled trial'/exp OR 'randomized controlled trial' OR (pragmatic AND ('clinical'/exp OR clinical) AND trials) OR (randomised AND controlled AND ('study'/exp OR study)) OR (randomised AND controlled AND ('trial'/exp OR trial)) OR (randomized AND controlled AND study;) OR (trial, AND randomized AND controlled)</p>                                                                                | <b>755145</b>                      |
| <b>#4</b> | <b>#1 AND #2 AND #3</b>                                                                                                                                                                                                                                                                                                                                                                                                                                                                                                        | <b>Final search</b><br><b>2615</b> |

**Supplementary Figure1:** Flowchart depicting the RCTs selection process

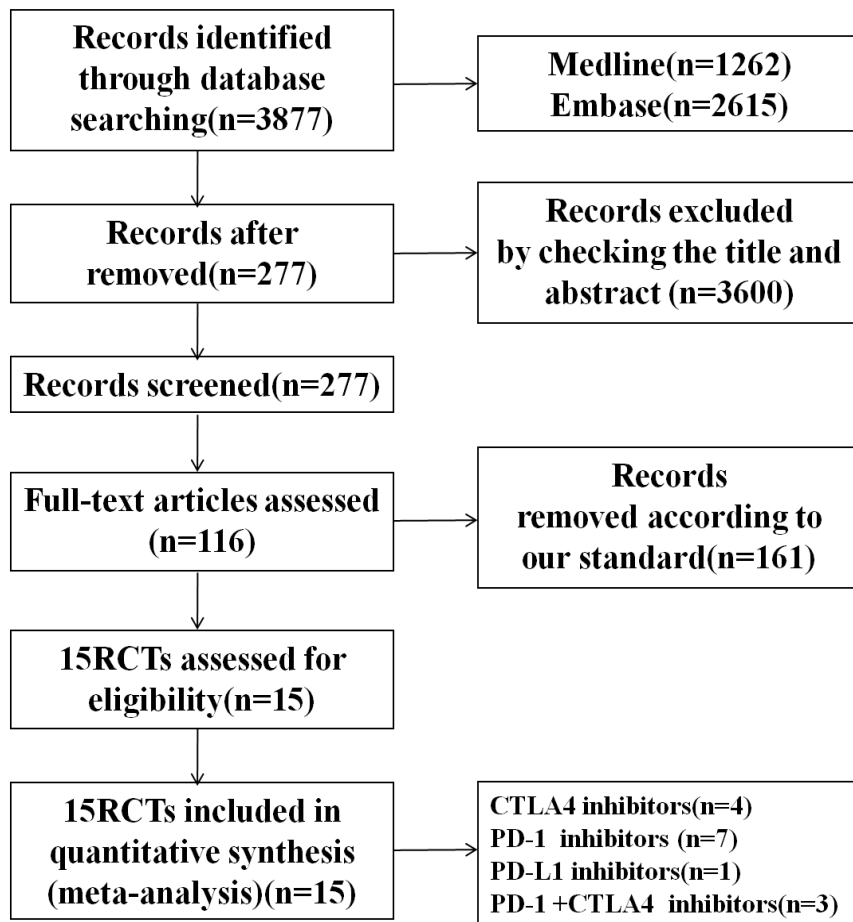

**Supplementary Figure2:** Risk of bias summary.

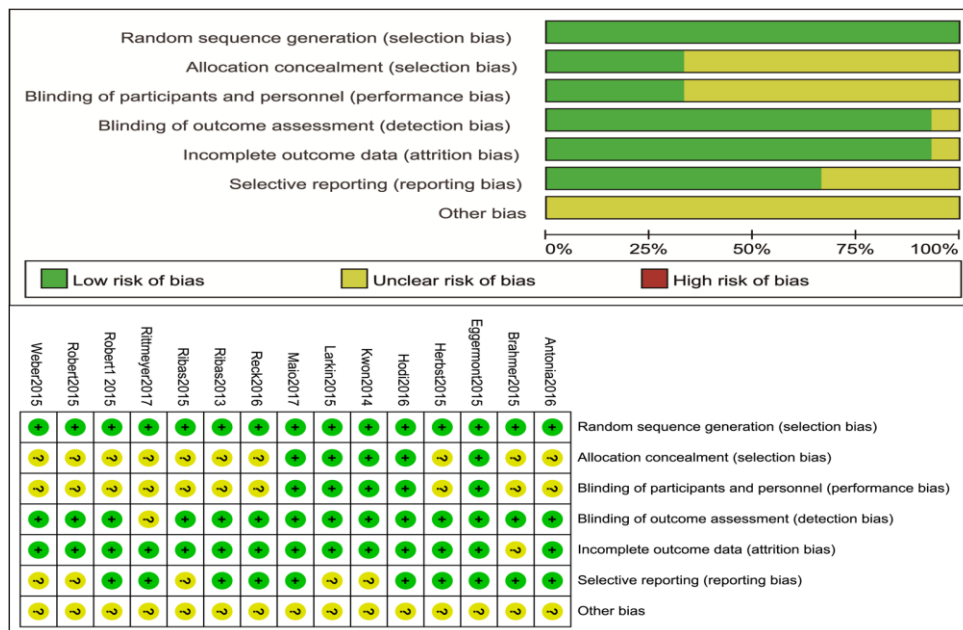

(A): Bar chart comparing percentage risk of bias for each included RCT. Low risk of bias (light black), high risk of bias (middle black), and unclear risk of bias (dark black). (B): Risk of bias for each included RCT, representing low risk of bias (+), high risk of bias (-), and unclear risk of bias (?).

**Supplementary Table2:** Evaluation of publication bias with Begg's test and Egger's test

|                            | trials | Heterogeneity |                | RR (95%CI)       | Begg's test |      | Egger's test |      |
|----------------------------|--------|---------------|----------------|------------------|-------------|------|--------------|------|
|                            |        | P             | I <sup>2</sup> |                  | Z           | P    | T            | P    |
| PD-1:pancreatitis (3-5)    | 6      | 0.705         | 0.0%           | 1.68(0.51,5.60)  | 0.75        | 0.45 | 1.33         | 0.25 |
| PD-1/L1:pancreatitis (3-5) | 7      | 0.692         | 0.0%           | 1.37(0.44,4.22)  | 0.30        | 0.76 | 0.62         | 0.56 |
| CTLA4:lipase (1-5)         | 3      | 0.667         | 0.0%           | 1.50(1.01,2.24)  | 0.00        | 1.00 | 0.25         | 0.85 |
| CTLA4:lipase (3-5)         | 3      | 0.585         | 0.0%           | 1.50(0.52,4.31)  | 0.00        | 1.00 | 0.03         | 0.98 |
| Nov+Ipi:lipase (3-5)       | 4      | 0.831         | 0.0%           | 6.44(1.39,29.79) | -0.34       | 1.00 | -1.36        | 0.31 |

PD-1: PD-1 inhibitor subgroup; PD-1/L1:PD-1/L1 inhibitor subgroup;CTLA-4:CTLA-4 inhibitor subgroup; 1-5:grade1-5; G3-5:grade3-5.

**Supplementary Figure3:** Begg's funnel plot

(1.1) Begg's funnel plot for pancreatitis (Grade3-5) in patients treated with *PD-1* inhibitors versus chemotherapy

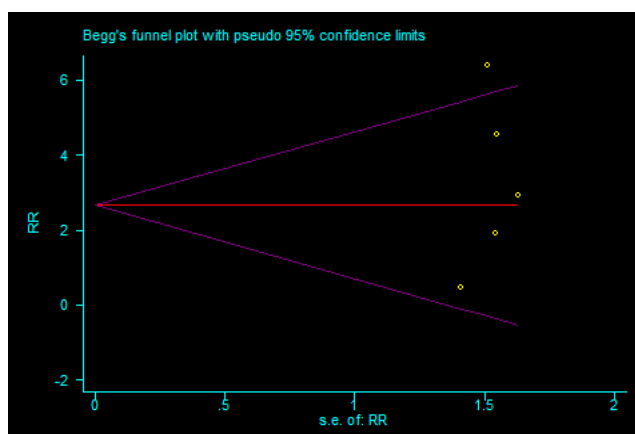

(1.2) Begg's funnel plot for pancreatitis (Grade3-5) in patients treated with *PD-1/PD-L1* inhibitors versus chemotherapy

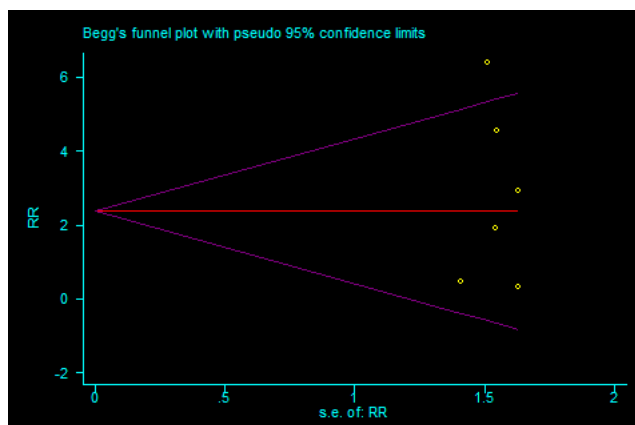

(2.1) Begg's funnel plot for lipase (Grade1-5) in patients treated with *CTLA4* inhibitors versus chemotherapy/placebo

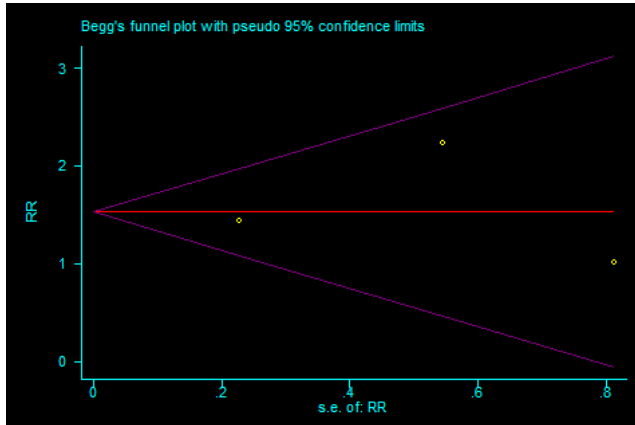

(2.2) Begg's funnel plot for lipase (Grade3-5) in patients treated with *CTLA4 inhibitors* versus chemotherapy/placebo

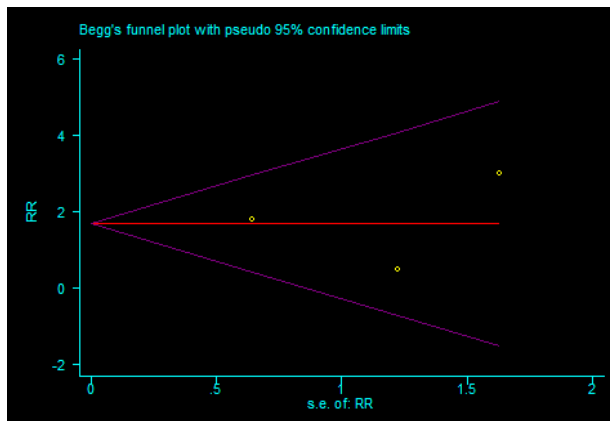

(2.3) Begg's funnel plot for lipase (Grade3-5) in patients treated with *nivolumab+ipilimumab* subgroup versus nivolumab/ipilimumab

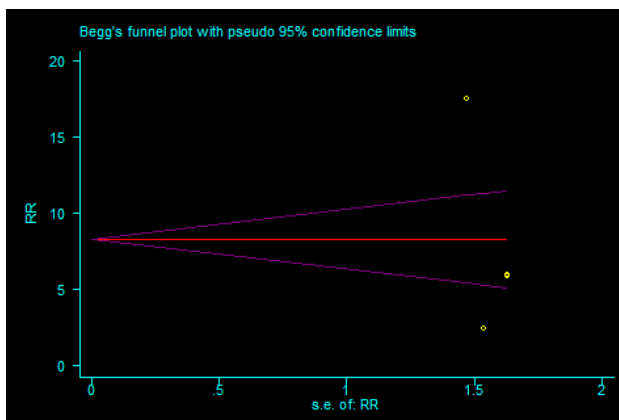

Supplement: f1 [file 1027323.f1.pdf]
